# Supplementary material for: A treatment planning study of combined carbon ion-beam plus photon intensity-modulated radiotherapy
Source: PubMed Central journal article supplement — Phys Imaging Radiat Oncol. 2020 Jul 10;15:16–22. doi: 10.1016/j.phro.2020.06.008 (PMC7807875; doi:10.1016/j.phro.2020.06.008), 2020-07-10
Supplement: mmc1.pdf [file mmc1.pdf]

## SUPPLEMENTARY MATERIAL

### *Derived metrics*

Various definitions are available for ID, CI and HI. The following were employed in this study:

$$ID = V_S * D_{\text{mean}}$$

where  $V_S$  is the subject volume exclusive of target volumes and  $D_{\text{mean}}$  is the mean dose applied to  $V_S$ , and

$$CI = \frac{V_{T,pi}}{V_{pi}} \quad \text{and} \quad HI = \frac{D_{95\%}}{D_{5\%}}$$

where  $V_{T,pi}$  is the subset of the target volume (T) receiving the prescription isodose (pi) or greater, and where  $V_{pi}$  is the volume enclosed by the prescription isodose (a CI variant proposed by Lomax et al. [1]), and where  $D_{5\%}$  and  $D_{95\%}$  specify the minimum doses delivered to the hottest 5% and 95% of the target volume.

### Reference

[1] Lomax NJ, Scheib SG. Quantifying the degree of conformity in radiosurgery treatment planning. Int J Radiat Oncol Biol Phys. 2003;55:1409-19.

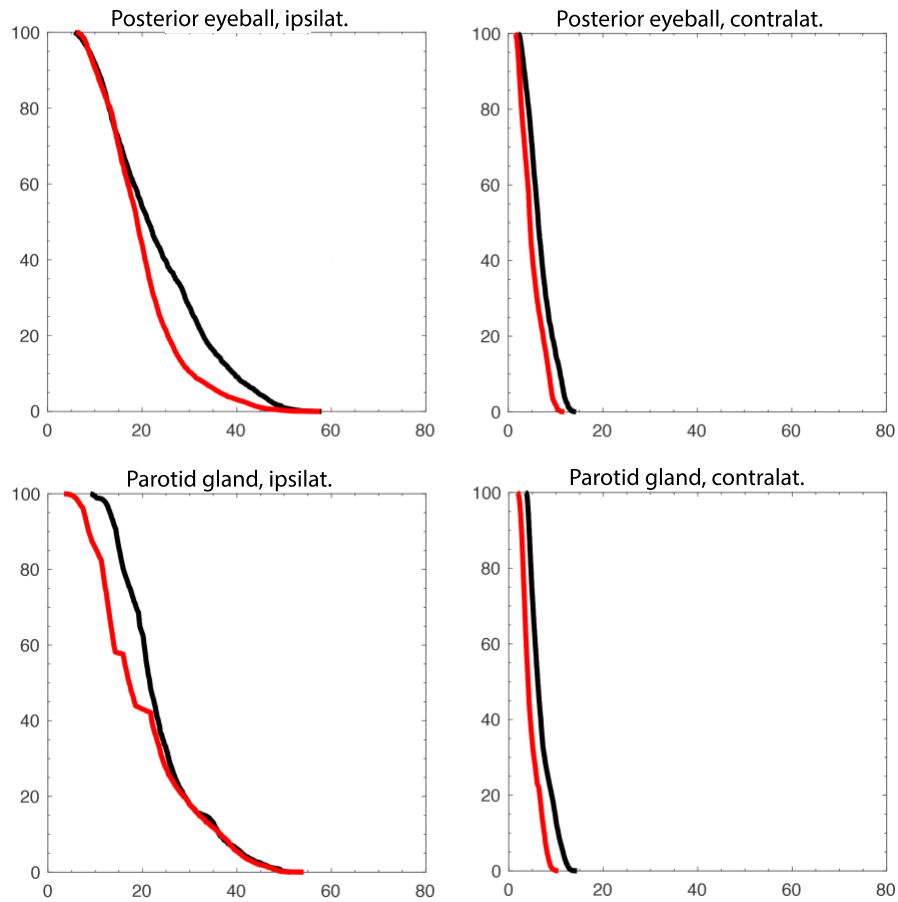

**Supplementary Figure S1.** Cumulative dose-volume histograms for additional OARs. *The abscissa displays the volume in %. The ordinate displays the dose in GyE. Black marks the clinical separated planning strategy. Red marks the experimental integrated planning strategy.*

**Supplementary Table S1.** The patient cohort for this study. All cases were of primary tumors and presented for adjuvant or definitive RT. *Elective target volumes are inclusive of the boost volumes.* PNS: paranasal sinuses.

| #  | Age Sex | Entity                                             | Site                                  | Elective vol (cm <sup>3</sup> ) | Boost vol (cm <sup>3</sup> ) | Setting    |
|----|---------|----------------------------------------------------|---------------------------------------|---------------------------------|------------------------------|------------|
| 01 | 50 M    | Adenocarcinoma (adenoid cystic)                    | PNS and orbit (left)                  | 393                             | 155                          | Adjuvant   |
| 02 | 41 M    | Malignant ductal tumor (uncertain differentiation) | Orbit (right)                         | 106                             | 60                           | Adjuvant   |
| 03 | 49 W    | Adenocarcinoma (adenoid cystic)                    | Soft palate                           | 350                             | 155                          | Adjuvant   |
| 04 | 35 W    | Adenocarcinoma (adenoid cystic)                    | Parotid gland (left)                  | 240                             | 108                          | Adjuvant   |
| 05 | 63 M    | Adenocarcinoma (basal cell)                        | Maxilla and sphenoid (left)           | 348                             | 184                          | Adjuvant   |
| 06 | 74 W    | Adenocarcinoma (unknown differentiation)           | Nasal cavity and PNS (right)          | 385                             | 165                          | Adjuvant   |
| 07 | 40 M    | Adenocarcinoma (adenoid cystic)                    | Parotid gland (right)                 | 459                             | 245                          | Definitive |
| 08 | 68 M    | Adenocarcinoma (intestinal-type)                   | Nasal cavity and PNS (left and right) | 268                             | 136                          | Adjuvant   |
| 09 | 29 M    | Adenocarcinoma (adenoid cystic)                    | Parotid gland (left)                  | 188                             | 117                          | Adjuvant   |
| 10 | 56 M    | Malignant mucosal melanoma                         | PNS (left)                            | 298                             | 205                          | Adjuvant   |

**Supplementary Table S2.** Overview of the dosimetric parameters that were derived from the cumulative dose distributions. Different subsets of the parameters listed above were evaluated for OARs, depending on their serial or parallel architecture as well as common clinical practice.

| Parameter                                    | Definition                                                                                                                                                       |
|----------------------------------------------|------------------------------------------------------------------------------------------------------------------------------------------------------------------|
| <i>Targets</i>                               |                                                                                                                                                                  |
| D <sub>99%</sub> , D <sub>98%</sub>          | Near-minimum doses, i.e. the minimum doses to 99% (98%) of the target volume (GyE)                                                                               |
| D <sub>50%</sub>                             | Median dose to the target volume (GyE)                                                                                                                           |
| D <sub>2%</sub> , D <sub>1%</sub>            | Near-maximum doses, i.e. the maximum doses to 1% (2%) of the target volume (GyE)                                                                                 |
| Cov <sub>100%</sub> , Cov <sub>95%</sub>     | Coverages, i.e. the percentage of the target volume receiving at least 100% (95%) of the prescription isodose, therefore 74 GyE (70.3 GyE) and 50 GyE (47.5 GyE) |
| CI <sub>boost</sub> , CI <sub>elective</sub> | Conformity indices, calculated as CI <sub>74GyE</sub> and CI <sub>50GyE</sub>                                                                                    |
| HI <sub>boost</sub> , HI <sub>elective</sub> | Homogeneity indices, calculated as HI <sub>95%</sub>                                                                                                             |
| <i>OARs</i>                                  |                                                                                                                                                                  |
| D <sub>1%</sub>                              | Near-maximum dose to the organ volume, analogous to the definition above                                                                                         |
| D <sub>50%</sub>                             | Median dose to the organ volume (GyE)                                                                                                                            |
| D <sub>mean</sub>                            | Mean dose to the organ volume (GyE)                                                                                                                              |
| <i>Subject volume</i>                        |                                                                                                                                                                  |
| ID                                           | Integral dose (GyEL)                                                                                                                                             |

**Supplementary Table S3.** Overview of the clinical endpoints and dosimetric parameters that served as the basis for assessment of toxicity risks for OARs.

| Volume                 | Endpoint                                                  | Parameter                                                           |
|------------------------|-----------------------------------------------------------|---------------------------------------------------------------------|
| Temporal lobe          | Incidence of symptomatic necrosis <3%                     | $D_{max} < 60.0$ GyE                                                |
| Brainstem              | Incidence of permanent cranial neuropathy or necrosis <5% | $D_{max} < 54.0$ GyE                                                |
| Spinal cord            | Incidence of grade $\geq 2$ myelopathy <1%                | $D_{max} \leq 50.0$ GyE                                             |
| Retina                 | Incidence of blindness <1%                                | $D_{max} < 50.0$ GyE                                                |
| Optic nerve and chiasm | Incidence of optic neuropathy <3%                         | $D_{max} < 55.0$ GyE                                                |
| Parotid gland          | Incidence of grade 4 xerostomia <20%                      | $D_{mean} < 20.0$ GyE unilateral<br>$D_{mean} < 25.0$ GyE bilateral |

**Supplementary Table S4.** Absolute minimum and/or maximum doses for CTVs and OARs. Keeping in mind that these metrics are very sensitive and therefore prone to misrepresentation, they are only provided as supplementary material. *Bold denotes statistical significance at level  $p < 0.05$ .*

| Volume (n)                       | Parameter   | Separated Strategy Median (IQR) | Integrated Strategy Median (IQR) | $\Delta$ Median (%) | p                |
|----------------------------------|-------------|---------------------------------|----------------------------------|---------------------|------------------|
| CTVboost (10)                    | $D_{100\%}$ | 43.8 (16.0)                     | 39.1 (10.2)                      | -4.7 (-11%)         | 0.3              |
|                                  | $D_{0\%}$   | 78.8 (1.8)                      | 78.6 (1.8)                       | -0.2 ( $\pm 0\%$ )  | 0.5              |
| CTVelective (10)                 | $D_{100\%}$ | 34.4 (5.8)                      | 32.2 (14.6)                      | -2.2 (-6%)          | 0.6              |
|                                  | $D_{0\%}$   | 77.9 (1.0)                      | 77.0 (0.7)                       | -1.0 (-1%)          | 0.2              |
| Temporal lobe ipsilat. (14)      | $D_{0\%}$   | 74.2 (2.7)                      | 71.9 (5.6)                       | -2.3 (-3%)          | <b>&lt;0.001</b> |
| Temporal lobe contralat. (6)     | $D_{0\%}$   | 24.7 (27.3)                     | 18.5 (22.9)                      | -6.2 (-25%)         | <b>0.03</b>      |
| Brainstem (10)                   | $D_{0\%}$   | 46.5 (23.0)                     | 41.7 (29.3)                      | -4.8 (-10%)         | <b>0.002</b>     |
| Spinal cord (10)                 | $D_{0\%}$   | 25.2 (7.6)                      | 21.7 (15.8)                      | -3.5 (-14%)         | <b>0.01</b>      |
| Posterior eyeball ipsilat. (14)  | $D_{0\%}$   | 57.7 (34.8)                     | 54.5 (37.1)                      | -3.2 (-6%)          | <b>0.009</b>     |
| Posterior eyeball contralat. (6) | $D_{0\%}$   | 14.1 (19.3)                     | 11.7 (16.8)                      | -2.4 (-17%)         | <b>0.03</b>      |
| Optic nerve ipsilat. (14)        | $D_{0\%}$   | 50.5 (25.5)                     | 50.3 (43.2)                      | -0.3 ( $\pm 0\%$ )  | 0.17             |
| Optic nerve contralat. (6)       | $D_{0\%}$   | 15.4 (33.3)                     | 11.9 (28.6)                      | -3.5 (-23%)         | 0.09             |
| Optic chiasm (9)                 | $D_{0\%}$   | 46.6 (31.5)                     | 46.7 (37.1)                      | +0.2 ( $\pm 0\%$ )  | 0.25             |
